# Supplementary material
Source: PubMed Central journal article supplement (PMC4256950)
Supplement: supp_czt089_czt089_Chinese.pdf [file supp_czt089_czt089_Chinese.pdf]

## 出生准备咨询对激励产前客户选择住院分娩方面的影响

世界卫生组织将出生和应急准备介绍为集中产前护理模型的重要组成部分。向那些进行产前检查的女性提供出生和应急准备相关的信息，目的在于鼓励她们使用专业分娩服务。然而，在日常环境中，出生和应急准备介绍的效力并没有被清晰地确立。本回顾性队列研究检验在布基纳法索地区的两个农村地区（库帕拉和多里），产前检查中接收出生和应急准备信息的女性与她们对专业分娩服务的使用情况之间的关系。本研究囊括了在这两个地区的 30 个农村医疗站的 456 位产前检查使用者。我们通过使用修订后的于约翰霍普金斯妇科产科国际教育项目的问卷和人口健康调查收集数据。逻辑回归用广义的估计等式模型来校正聚集效应。在住院分娩率（80%）相对较高的库帕拉地区，对出生和应急准备相关的信息的使用并没有提高住院分娩率。相反，在住院分娩率（47%）相对较低的多里地区，关于危险迹象（AOR=1.93，95%CI: 1.07, 3.49）和护理费用（AOR=2.13，95%CI: 1.09, 4.22）与提高住院分娩可能性之间呈现正相关关系。基于这些研究结果，我们可以看出，在住院分娩率低的地区，向进行产前检查的女性提供出生和应急准备相关的信息或许能鼓励他们选择专业分娩服务（提高住院分娩率）。因此，根据不同地区人们的特殊需求调整信息的内容变得至关重要。此外，卫生机构中应该贯彻出生和应急准备的咨询。
