# Supplementary material
Source: PubMed Central journal article supplement (PMC4256950)
Supplement: supp_czt089_czt089_French.pdf [file supp_czt089_czt089_French.pdf]

# Augmenter les accouchements institutionnalisés parmi les clientes des services de consultation prénatale: effet des conseils de préparation à l'accouchement

Accepté le 17 octobre 2013

L'Organisation mondiale de la santé considère la préparation à l'accouchement et aux risques liés à ce dernier comme un élément essentiel du programme des soins prénatals focalisés. Les conseils prodigués aux femmes pendant la préparation au cours des visites prénatales ont pour but d'augmenter le nombre d'accouchements encadrés par du personnel soignant qualifié. Cependant, l'efficacité de ce facteur n'a pas été clairement démontrée dans des contextes de routine. Cette étude rétrospective de groupe analyse le lien, dans deux districts ruraux du Burkina Faso (Koupela et Dori), entre les femmes recevant des conseils lors des visites prénatales dans le cadre de la préparation et le recours à du personnel soignant qualifié pour l'accouchement. L'étude a été réalisée auprès de 456 utilisatrices des services de consultation prénatale, dans trente centres communautaires de santé parmi les deux districts cités ci-dessus. Nous avons collecté les données en utilisant des questionnaires modifiés du programme *Johns Hopkins Program for International Education in Gynecology and Obstetrics* ainsi qu'en utilisant des études démographiques et des études concernant le domaine de la santé. Une analyse logistique de régression a été appliquée en utilisant un modèle d'équations d'estimation généralisées pour ajuster les effets de regroupement. Dans le district de Koupela, où le taux d'accouchements institutionnalisés est élevé (80%), les conseils prodigués lors des visites prénatales dans le cadre de la préparation ne sont pas liés à une augmentation des accouchements institutionnalisés. En revanche dans le district de Dori, où le taux d'accouchements institutionnalisés est bien plus faible (47%), nous observons un lien entre les conseils concernant les signes de risques (Rapport de Cotes ajusté $\frac{1}{4}$ 1.93; 95% IC: 1.07, 3.49) ainsi que le coût des soins (RCA $\frac{1}{4}$ 2.13; 95% IC: 1.09, 4.22) et une augmentation probable des accouchements institutionnalisés. Au regard de ces résultats, il nous semble que les conseils lors des visites prénatales dans le cadre de la préparation à l'accouchement peuvent inciter à avoir recours à du personnel soignant qualifié (augmentation du taux d'accouchements institutionnalisés) dans des zones où le taux d'accouchements institutionnalisés est relativement faible. En conséquence, il est important d'adapter les conseils prodigués pour répondre aux besoins spécifiques des patientes dans chaque localité. De plus, des services de conseils pour la préparation à l'accouchement et aux risques liés à ce dernier devraient être mis en place dans tous les centres de santé.

Mots clés : Préparation à l'accouchement et aux risques liés, personnel soignant qualifié pour l'accouchement, santé maternelle, Burkina Faso
