# Supplementary material
Source: PubMed Central journal article supplement (PMC4256950)
Supplement: supp_czt089_czt089_Spanish.pdf [file supp_czt089_czt089_Spanish.pdf]

## **Aumento de los partos institucionales entre los clientes de atención prenatal: efecto del asesoramiento en preparación para el parto**

**Dieudonné Soubeiga, Driss Sia y Lise Gauvin**

**Aceptado** 17 de octubre de 2013

La Organización Mundial de la Salud recomienda la preparación para el nacimiento y las emergencias (PNE) como componentes esenciales del modelo de Atención Prenatal Enfocada. El propósito de proporcionar mensajes PNE a las mujeres durante sus visitas prenatales es aumentar el uso de la asistencia calificada durante el parto. Sin embargo, la eficacia de este componente todavía no se ha establecido claramente en contextos de rutina. Este estudio de serie retrospectivo examinó la asociación entre la exposición de las mujeres a los mensajes PNE durante las visitas prenatales y el uso de la asistencia calificada durante el parto en dos distritos rurales de Burkina Faso (Koupela y Dori). El estudio incluyó 456 usuarias de atención prenatal en 30 centros de salud rurales en estos dos distritos. Los datos fueron recolectados por medio de cuestionarios modificados del Programa Johns Hopkins para la Educación Internacional en Ginecología y Obstetricia y de encuestas demográficas y de salud. La regresión logística se realizó con un modelo de ecuación de estimación generalizada para ajustar para efectos agrupados. En el distrito Koupela, donde la tasa de partos institucionales (80%) fue relativamente alta, el uso de mensajes de PNE no se asoció con un aumento en los partos institucionales. Por el contrario, en el distrito Dori, donde la tasa de partos institucionales (47%) fue menor, los mensajes sobre los signos de peligro (AOR = 1,93, 95%: CI: 1.07, 3.49) y el costo de la atención (AOR =

2,13, 95% CI: 1,09, 4,22) se relacionan con una mayor probabilidad de partos institucionales. Con base en estos resultados, parece que los mensajes de la natalidad y la preparación de emergencia suministrados durante las visitas prenatales pueden aumentar el uso de la asistencia especializada (aumento de la tasa de partos institucionales) en las zonas donde los partos institucionales son bajos. Por lo tanto, es importante adaptar el contenido de los mensajes para satisfacer las necesidades particulares de los usuarios en cada localidad. Por otra parte, el asesoramiento PNE debería ser implementado en las instalaciones de salud.

### **Palabras Claves**

preparación para el nacimiento y las emergencias, asistencia calificada durante el parto, atención prenatal, salud materna, Burkina Faso

### **MENSAJES CLAVES**

- Los mensajes sobre la preparación para el nacimiento y las emergencias prestados a las mujeres durante las visitas prenatales de rutina pueden contribuir a aumentar el uso de la asistencia calificada durante el parto, en las zonas donde este uso es bajo.
- Es importante adaptar el contenido de los mensajes sobre la preparación para el nacimiento y las emergencias a las necesidades de los usuarios de cada localidad.
